# Supplementary material for: A Multifaceted Quality Improvement Programme to Improve Acute Kidney Injury Care and Outcomes in a Large Teaching Hospital
Source: PubMed Central journal article supplement — BMJ Qual Improv Rep. 2017 May 25;6(1):u219176.w7476. doi: 10.1136/bmjquality.u219176.w7476 (PMC5457974; doi:10.1136/bmjquality.u219176.w7476), 2017-05-25
Supplement: bmjqir.u219176.w7476supp.pdf [file bmjqir.u219176.w7476supp.pdf]

| ACUTE KIDNEY INJURY PRIORITY CARE CHECKLIST (PCC)                            |                                                            |                       |                                                                                                                              |                                                                                            |
|------------------------------------------------------------------------------|------------------------------------------------------------|-----------------------|------------------------------------------------------------------------------------------------------------------------------|--------------------------------------------------------------------------------------------|
| Name : _____                                                                 |                                                            | Hospital No: _____    |                                                                                                                              |                                                                                            |
| AKI Stage : ____                                                             |                                                            | Cr Result : ____      | Baseline Cr: ____ (Date: _____)                                                                                              |                                                                                            |
| Ward : _____                                                                 |                                                            | PCC Date : _____      |                                                                                                                              |                                                                                            |
| Doctor to tick when completed                                                | Priority Care Action                                       | Tick                  |                                                                                                                              | Guidance                                                                                   |
|                                                                              | 1. Ascertain baseline creatinine (Lowest in last 6 months) | Done                  |                                                                                                                              | If no Cr results in last 6 months ring GP                                                  |
|                                                                              | 2. Identify cause for AKI                                  | Done                  |                                                                                                                              | Document possible cause(s) in medical notes *                                              |
|                                                                              | 3. Perform fluid assessment                                | Done                  |                                                                                                                              | Minimum of daily fluid assessment                                                          |
|                                                                              | 4. Investigate for cause & consequences                    | Done                  |                                                                                                                              | 1 -Sepsis Markers #<br>2- Venous Bicarb or ABG *                                           |
|                                                                              | 5. Consider catheterisation                                | Done                  | NA                                                                                                                           | 1- All stage 3<br>2 - Obstruction suspected                                                |
|                                                                              | 6. Renal & bladder ultrasound scan                         | Done                  | NA                                                                                                                           | 1- All stage 3<br>2 - Suspected obstruction (NICE Guidelines <24hrs)                       |
| 7. Consider referral to renal                                                | Done                                                       | NA                    | 1- Stage 3 Unclear Cause<br>2- Suspected Intrinsic Renal Disease<br>3- No Improvement > 24hrs<br>4- Dialysis may be Required |                                                                                            |
| Nurse                                                                        | 8. Fluid balance charts                                    | Done                  |                                                                                                                              | 1- Strict Intake and output chart until further notice<br>2-Daily weights                  |
|                                                                              | 9. Perform & document urine dipstick                       | Done                  |                                                                                                                              | 1- MSSU(Infection Suspected)<br>2 - ≥ 2+ protein Send Urine-PCR                            |
| Pharmacist                                                                   | 10. Perform drug review                                    | Done                  | NA                                                                                                                           | 1-Stop nephrotoxins (ACE-I ,ARB, NSAID)<br>2 -Dosage review (antibiotics, diuretics, LMWH) |
| * Refer to Acute Kidney Injury Guidelines under Resources on Trust Intranet. |                                                            |                       |                                                                                                                              |                                                                                            |
| # Refer to Sepsis Guidelines.                                                |                                                            |                       |                                                                                                                              |                                                                                            |
| Doctor Name/Sign: _____                                                      |                                                            | Position/Bleep: _____ |                                                                                                                              |                                                                                            |

Supplementary Figure 1- Priority Care Checklist

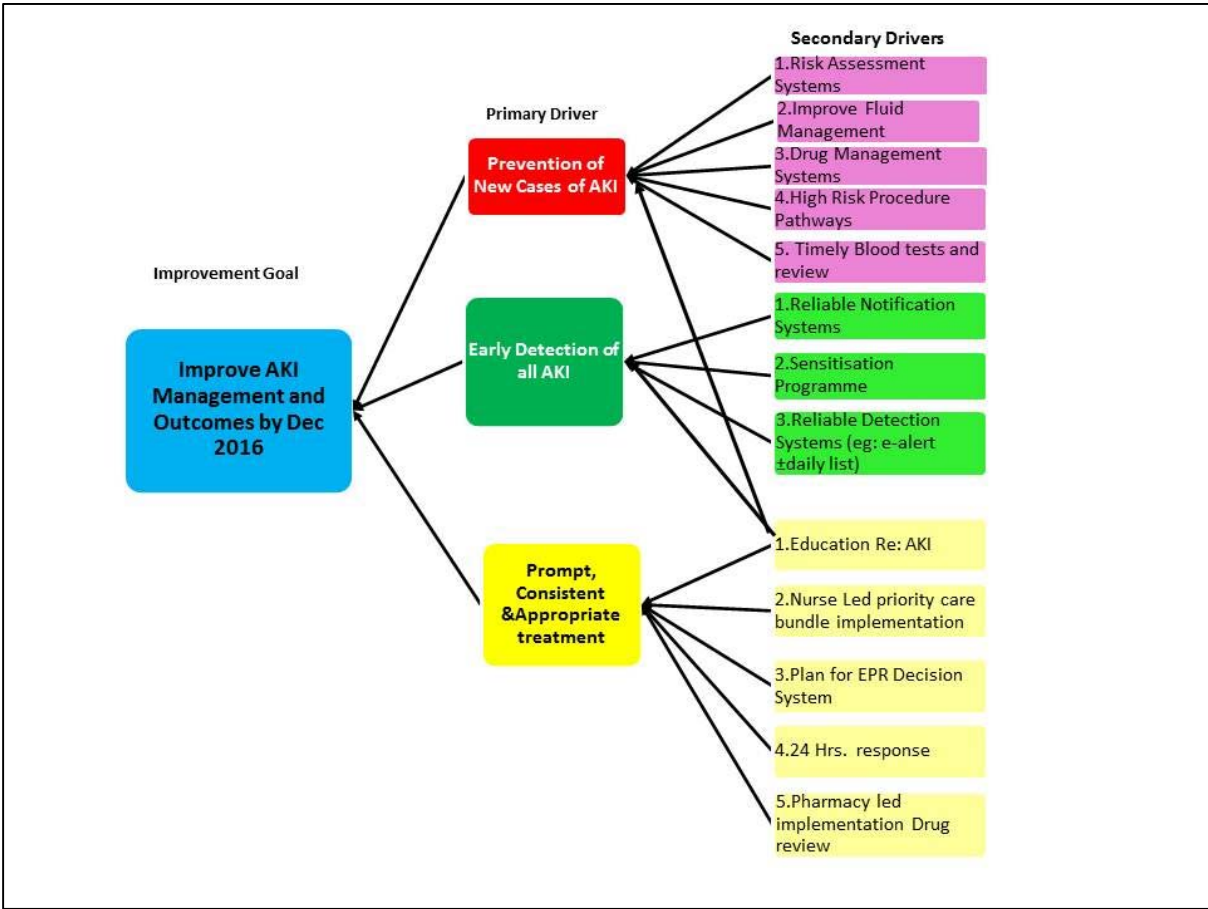

Supplementary Figure 2: Driver diagram

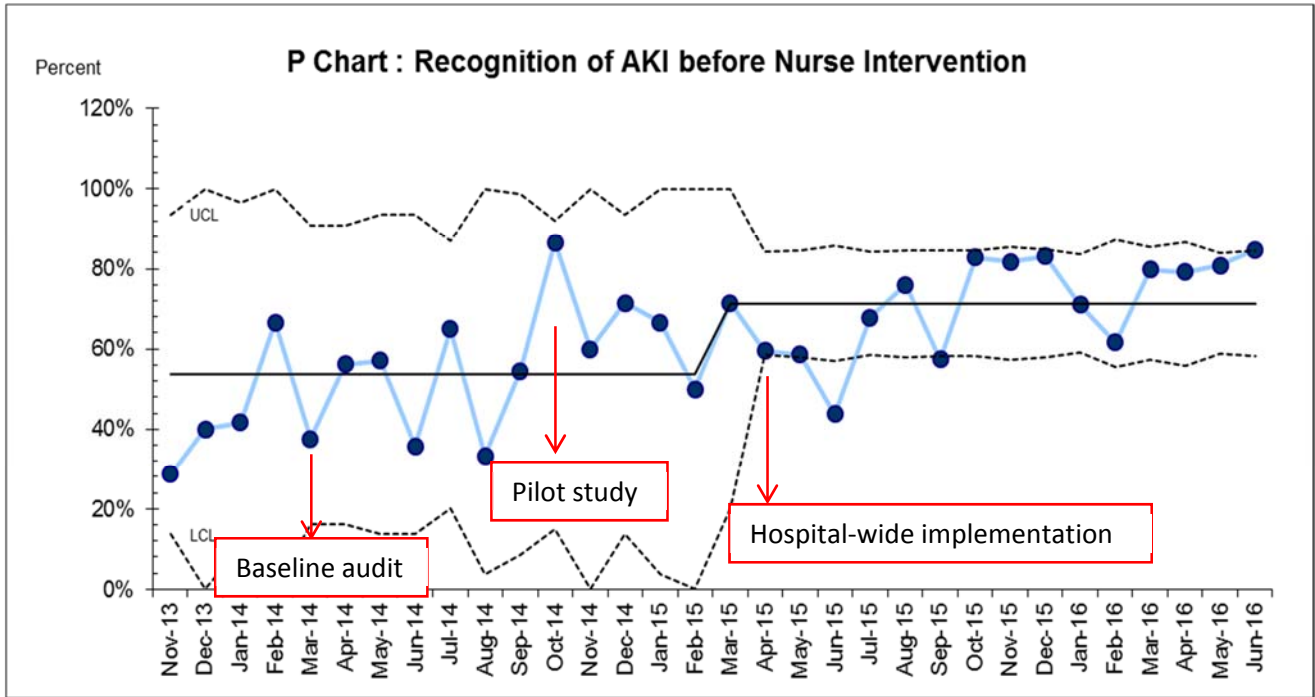

**Supplementary Figure 3: Detection of AKI within 24 hours by ward teams.**

AKI was detected within 24 hours in 47% of cases at baseline. This recognition by ward teams prior to the specialist nurses' visit to 84%.

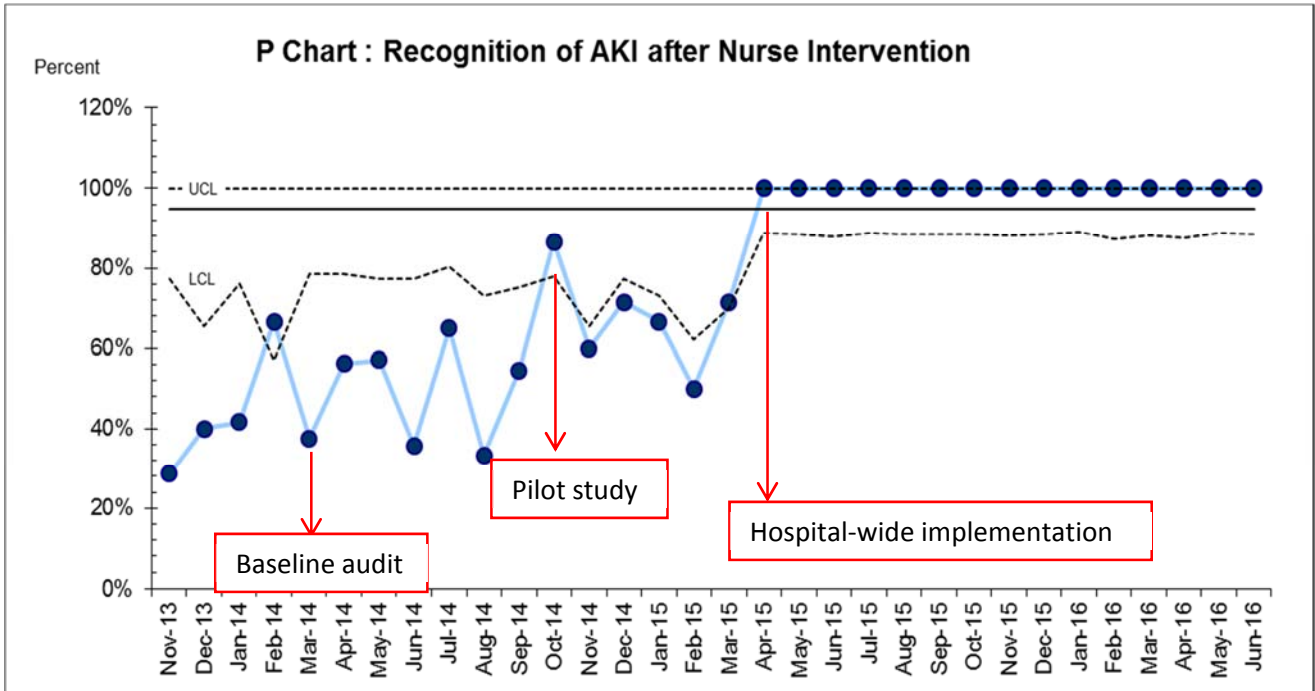

**Supplementary Figure 4: Detection of AKI within 24 hours by the combination of ward teams and specialist nurses.**

The combination of the ward teams, assisted by the AKI specialist nurses has consistently delivered 100% recognition within 24 hours since full implementation of the QI programme.

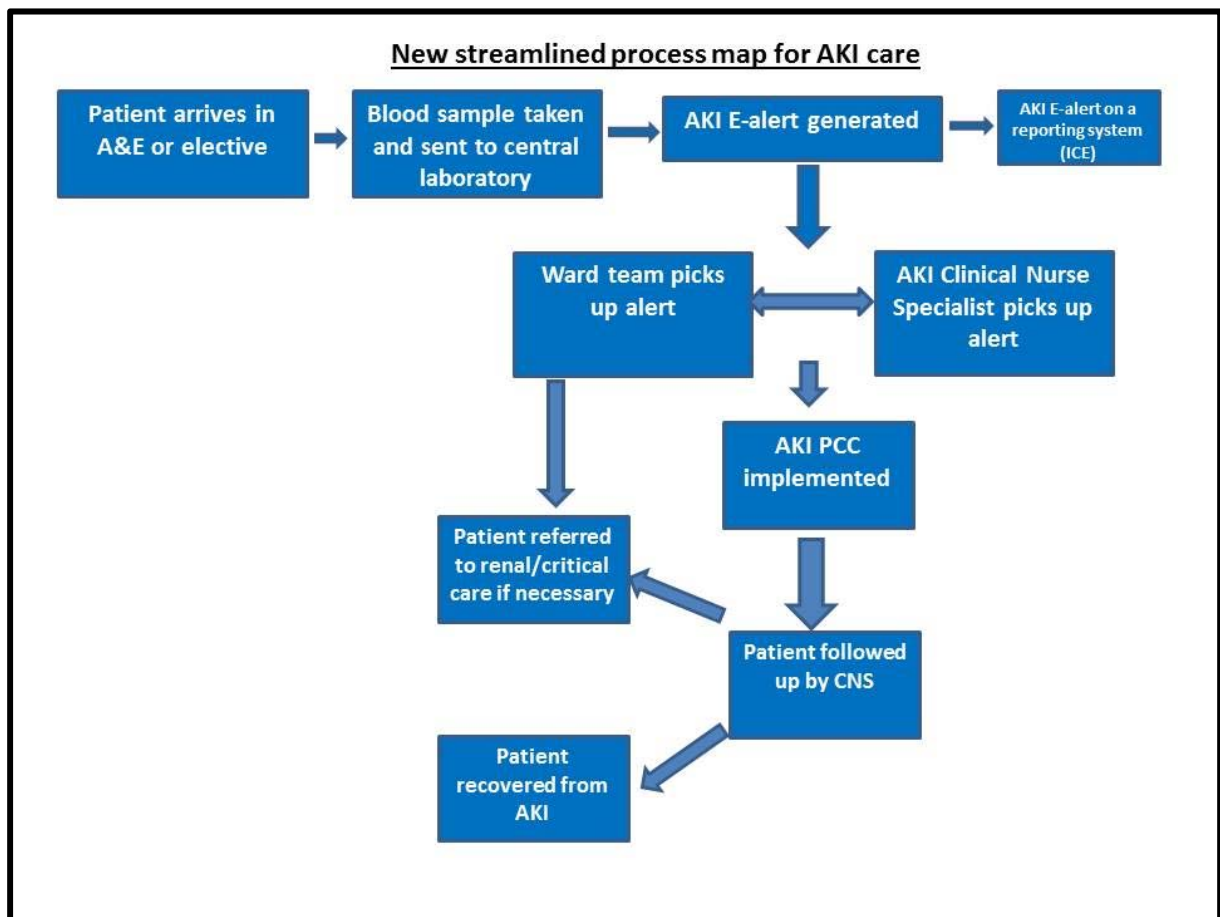

**Supplementary Figure 5: New Streamline Process for detection and management of AKI.**

In comparison to the pre-intervention AKI care process in figure 2, AKI detection and management now follows this new streamlined process that has strengthened or eliminated previous areas of weakness.

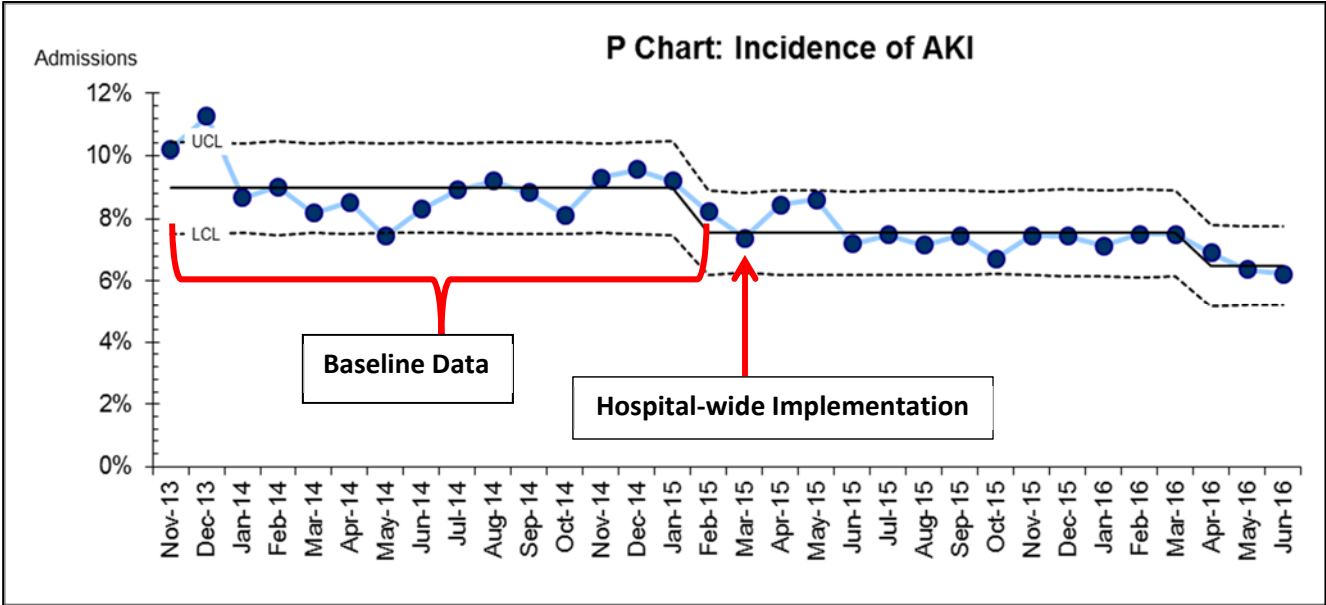

**Supplementary Figure 5: Percentage chart showing incidence of AKI**

Overall AKI incidence in inpatients has fallen consistently from a baseline of 9% of all admissions to 6.5% currently (31%).

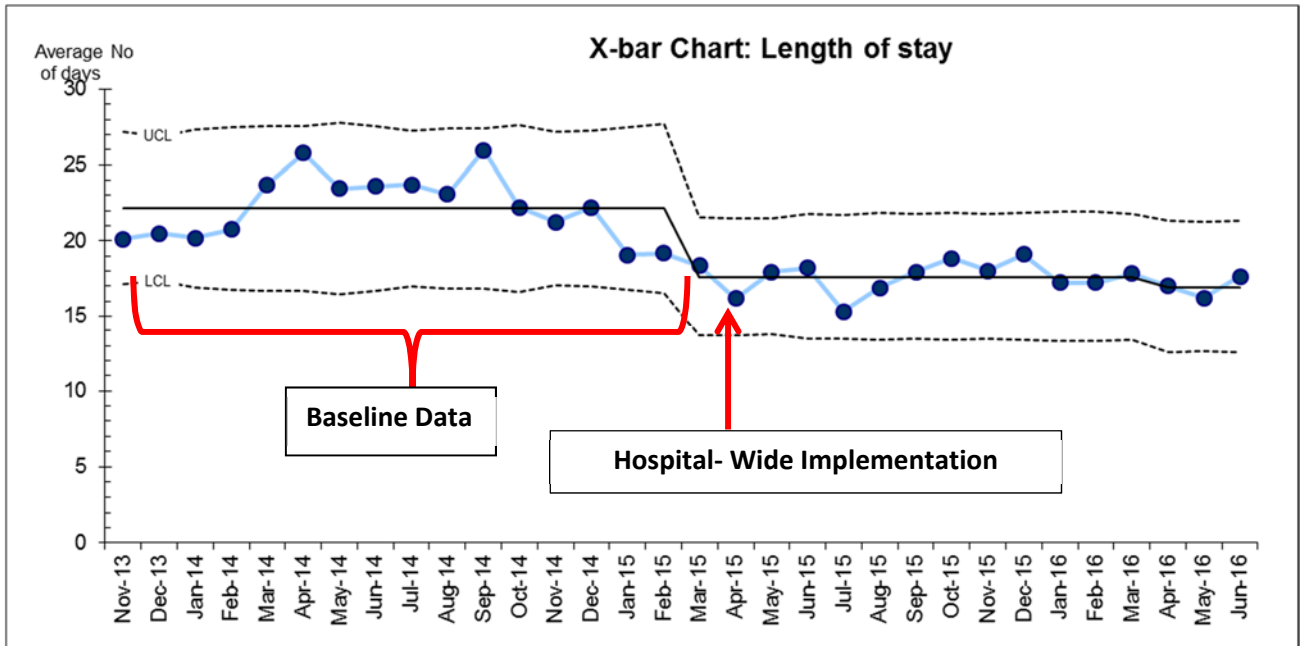

**Supplementary Figure 6: Chart showing average length of stay of AKI patients**

Prior to the QI programme, the average length of stay of patients with AKI was 22.1 days; this is currently sustained at an average of 17 days (23% reduction).

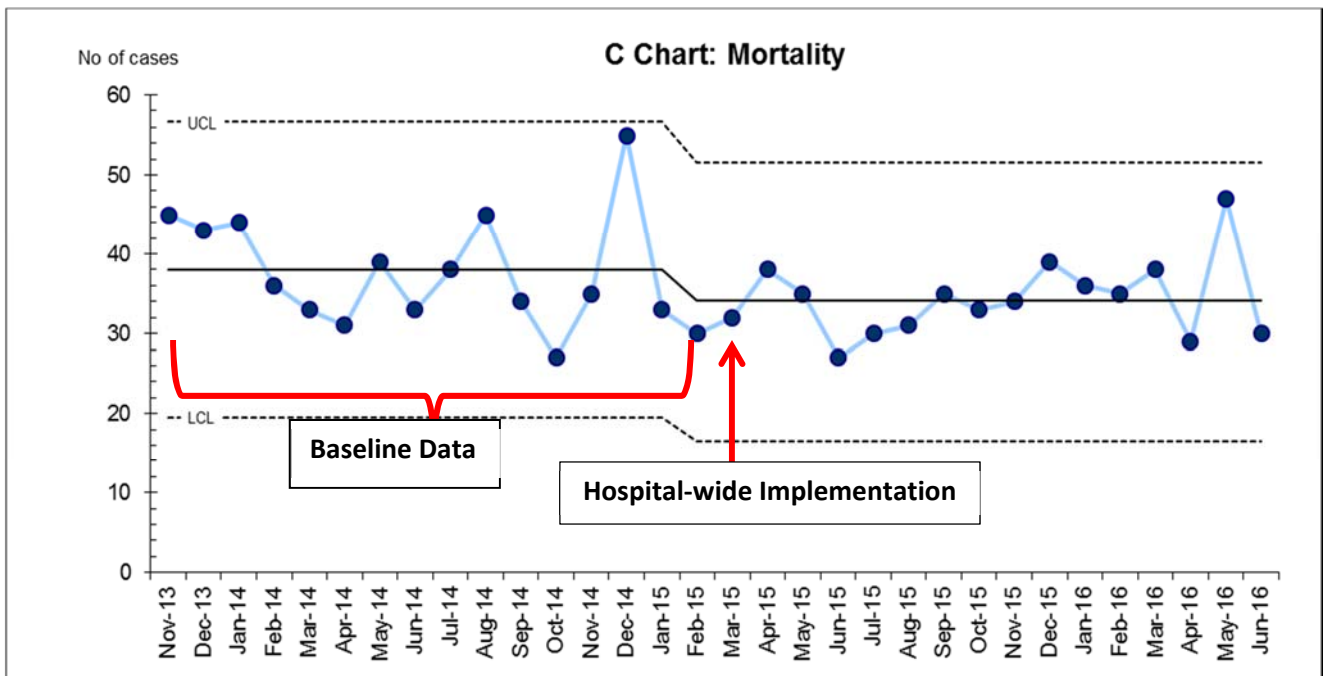

**Supplementary Figure 7: Chart showing number of deaths of patients with a diagnosis of AKI**

An average of 38 patients with a diagnosis of AKI died each month prior to the QI programme. There has been a tendency towards a reduction, with the current average of monthly deaths being 34 (10.5% reduction)

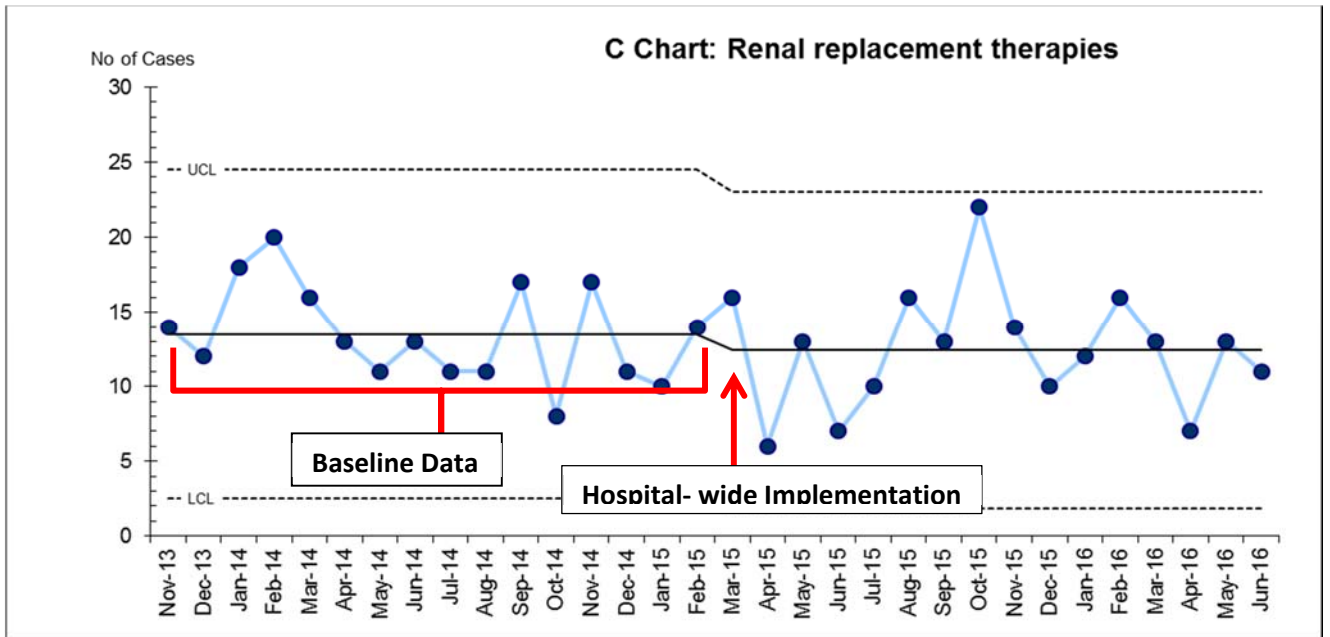

**Supplementary Figure 8: Chart showing number of patients with AKI requiring renal replacement therapy**

The average number of patients requiring dialysis and/or haemofiltration has not seen any significant change.

|                                  | Nurse                      | Pharmacist No |         | Pharmacist Yes |           |
|----------------------------------|----------------------------|---------------|---------|----------------|-----------|
|                                  |                            | PCB No        | PCB Yes | PCB No         | PCB Yes   |
| No Education<br>-                |                            | -             |         | -              | +         |
|                                  | No alerting<br>-           | 5             | 14& 15  | AM2            | CCU/35    |
|                                  | Face to face Alerting<br>+ | AMU FEMALE    | 45& 46  | ETC S          | ESTU M& F |
|                                  | Telephonic alerting<br>0   | CSITU         | AM1     | WARD 30.31.32  | AMU MALE  |
| Education to clinical Staff<br>+ | No alerting<br>-           | 7&8           | 4       | HDU            | 3         |
|                                  | Face to face Alerting<br>+ | AM4           | 11&12   | 37             | 44        |
|                                  | Telephonic alerting<br>0   | AM3           | ITU     | 9& 10          | 36        |

**Supplementary Figure 9: Ward area allocation showing intervention(s) for factorial design study**

This table shows the intervention factor allocation for the various experimental units in white (wards). The interventions are shown in orange and yellow with (+) and (-) denoting the use or not of that intervention within the relevant experimental unit. Reading the row across from the left and the column downwards from the top gives the combination of interventions for that particular unit. For instance, "AMU Female" had "No Education", "Face to face alerting by nurse" and "No pharmacist".
